# Supplementary material for: Core@shell structured flower-like Co0.6Fe2.4O4@MoS2 nanocomposites: a strong absorption and broadband electromagnetic wave absorber
Source: Royal Society of Chemistry journal article supplement (doi:10.1039/c9tc02140j), 2019-01-01
Supplement: c9tc02140j1.pdf [file c9tc02140j1.pdf]

## *Supporting Information*

# **Core@shell structured flower-like $\text{Co}_{0.6}\text{Fe}_{2.4}\text{O}_4$ @ $\text{MoS}_2$ nanocomposites: a strong absorption and broadband electromagnetic wave absorber**

Lin Long,<sup>a</sup> Erqi Yang,<sup>a</sup> Xiaosi Qi,<sup>a,b,\*</sup> Ren Xie,<sup>a</sup> Zhongchen Bai,<sup>a</sup> Shuijie Qin,<sup>a</sup> Wei  
Zhong,<sup>b,\*</sup>

<sup>a</sup>*College of Physics, Guizhou Province Key Laboratory for Photoelectrics Technology and  
Application, Guizhou University, Guiyang City 550025, People's Republic of China*

<sup>b</sup>*Nanjing National Laboratory of Microstructures and Jiangsu Provincial Laboratory for  
NanoTechnology, Nanjing University, Nanjing 210093, People's Republic of China*

---

\*Corresponding author. Phone: +86-25-83621200. Fax: +86-25-83595535

E-mail: xsqi@gzu.edu.cn, wzhong@nju.edu.cn

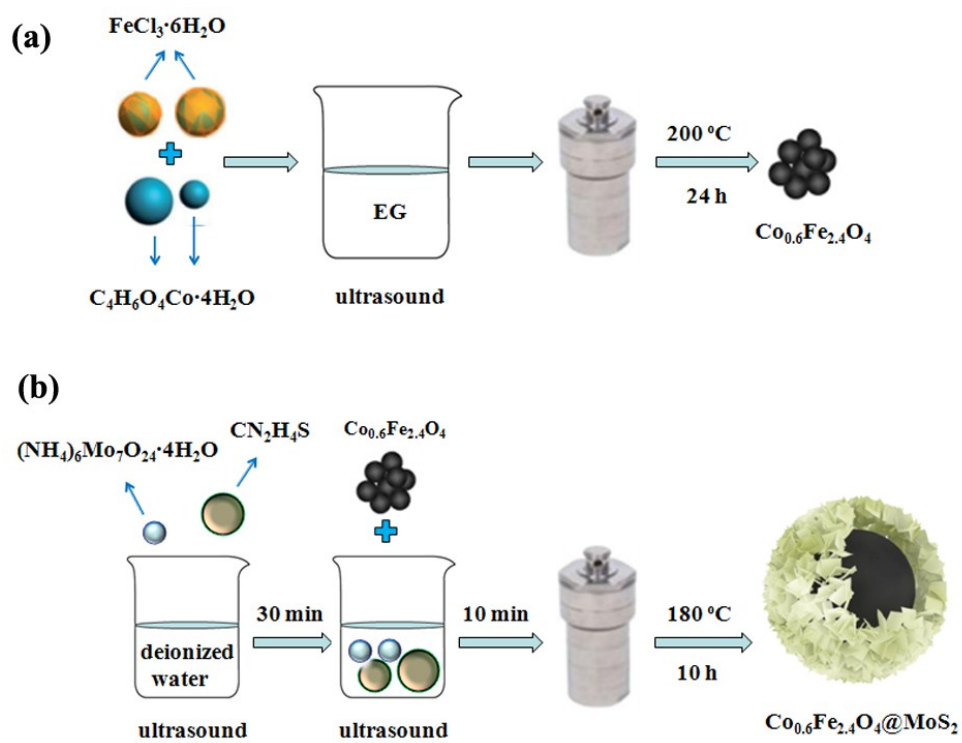

**Figure S1.** Schematic illustration of production process for the as-prepared  $\text{Co}_{0.6}\text{Fe}_{2.4}\text{O}_4$  and  $\text{Co}_{0.6}\text{Fe}_{2.4}\text{O}_4 @ \text{MoS}_2$ .

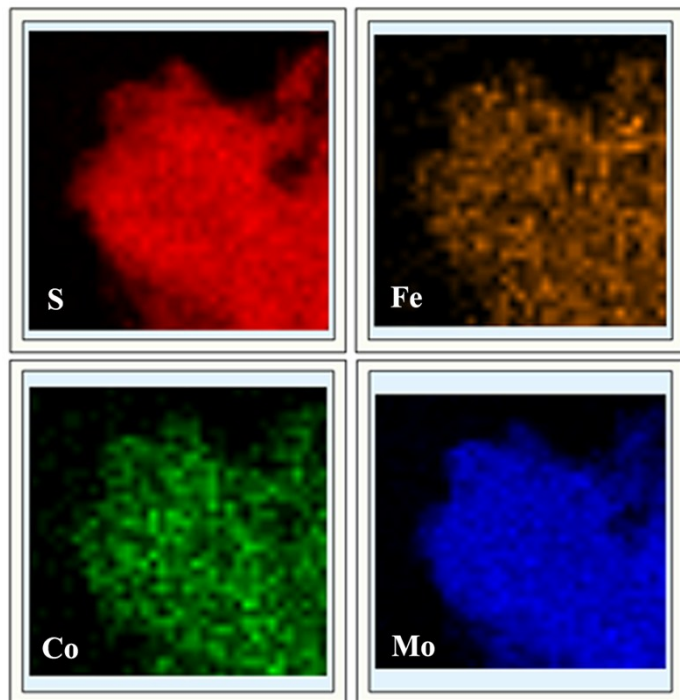

**Figure S2.** EDX elemental maps of the obtained  $\text{Co}_{0.6}\text{Fe}_{2.4}\text{O}_4 @ \text{MoS}_2$ .

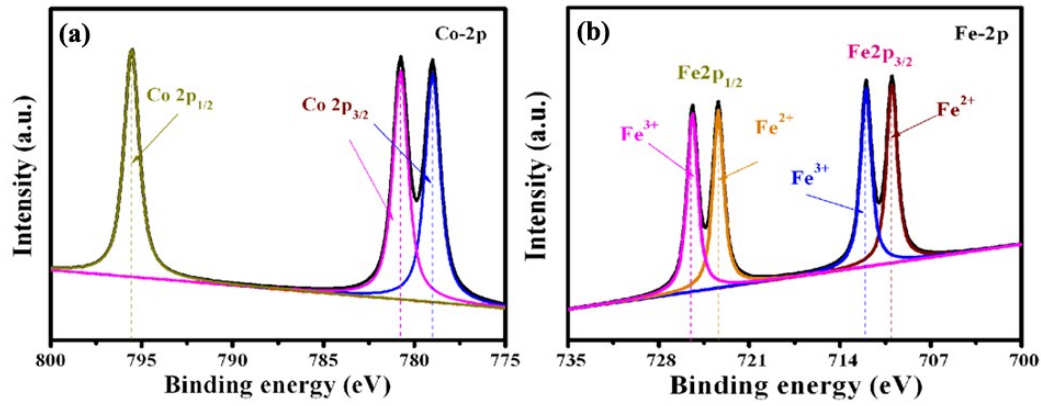

**Figure S3.** XPS spectra of (a) Co-2p, and (b) Fe-2p for the obtained sample.

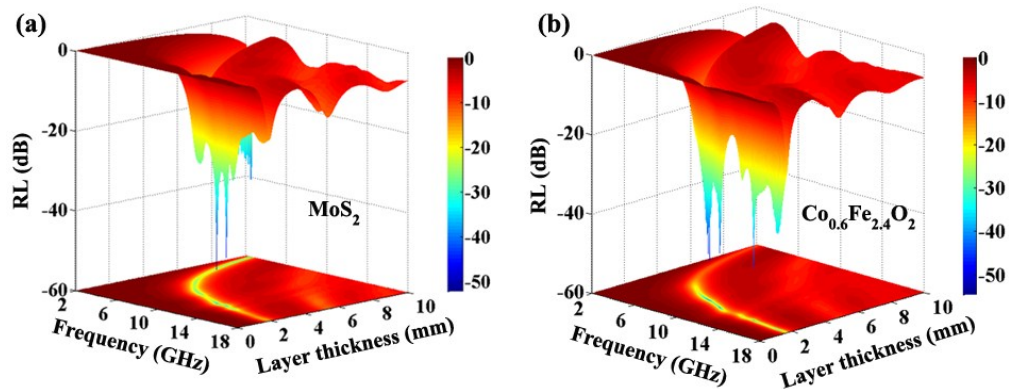

**Figure S4.** Three-dimensional and typical RL curves of (a) MoS<sub>2</sub> (b) Co<sub>0.6</sub>Fe<sub>2.4</sub>O<sub>4</sub> samples.

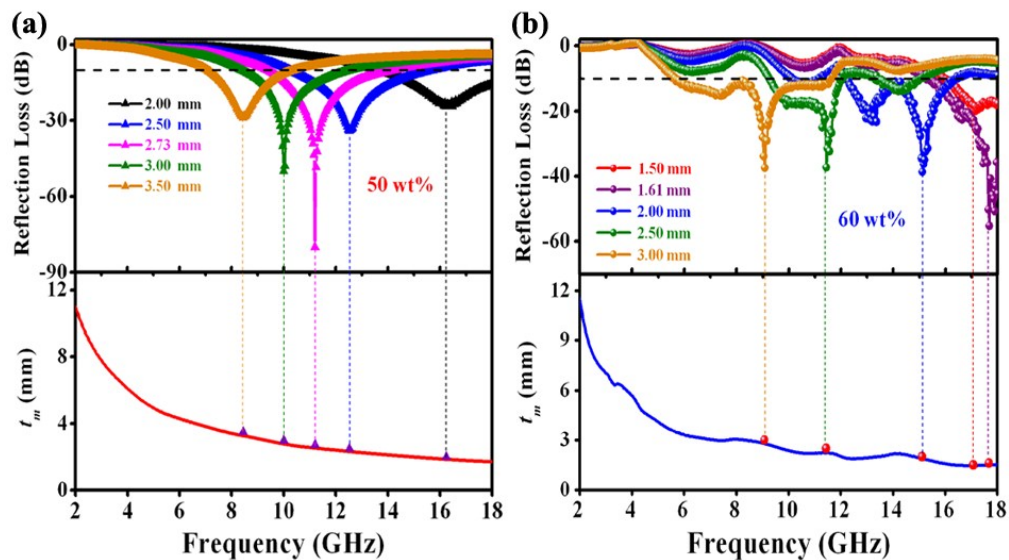

**Figure S5.** Comparison of the matching thickness obtained from the calculation and RL curves as shown in Figure 3 for (a) CM-50 and (b) CM-60.

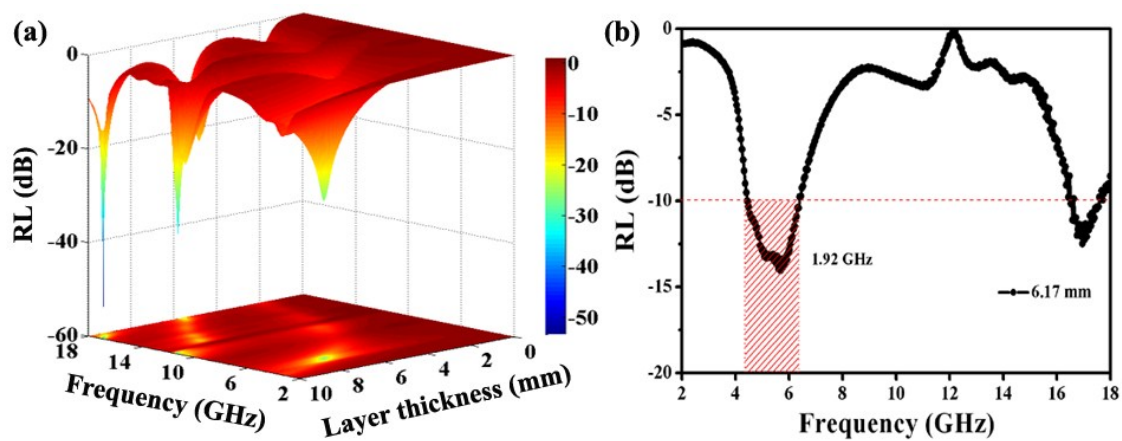

**Figure S6.** (a) Three-dimensional, and (b) typical RL curves of the as-prepared  $\text{MoS}_2@ \text{Co}_{0.6}\text{Fe}_{2.4}\text{O}_4$  sample.

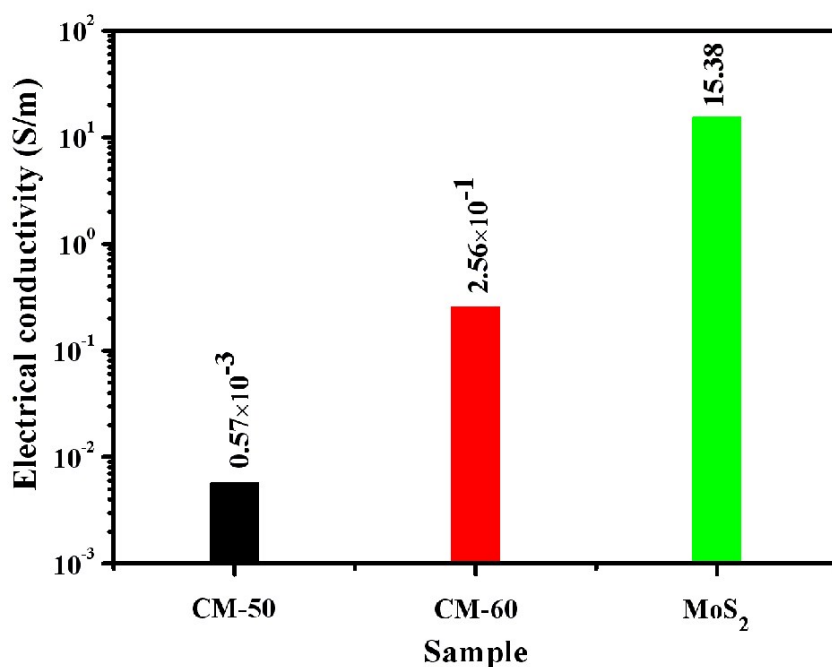

**Figure S7.** Electrical conductivity of the as-prepared CM-50, CM-60 and flower-like  $\text{MoS}_2$  nanosheets.
